# Supplementary material for: Reversible and Irreversible Effects of Electroporation on Contractility and Calcium Homeostasis in Isolated Cardiac Ventricular Myocytes
Source: PubMed Central journal article supplement (PMC9665944; doi:10.1161/circep.122.011131), 2022-10-28
Supplement: hae-15-e011131-s001.pdf [file hae-15-e011131-s001.pdf]

## SUPPLEMENTAL MATERIAL

| Voltage<br>(V) | Parallel to the<br>electrical<br>field |      | Perpendicular to<br>the electrical<br>field |      |
|----------------|----------------------------------------|------|---------------------------------------------|------|
|                | $0 \pm 10^\circ$                       | n N  | $90 \pm 10^\circ$                           | n N  |
| 140            | $100 \pm 0.00$                         | 43 2 | $87.5 \pm 5.94$                             | 32 2 |
| 120            | $92.31 \pm 4.00$                       | 39 4 | $65.93 \pm 5.00$                            | 91 4 |
| 100            | $82.86 \pm 4.54$                       | 70 4 | $38.16 \pm 5.61$                            | 76 4 |
| 90             | $75.00 \pm 5.64$                       | 60 4 | $32.10 \pm 5.22$                            | 81 4 |
| 80             | $46.15 \pm 8.09$                       | 39 4 | $3.85 \pm 2.69$                             | 52 4 |
| 70             | $27.27 \pm 6.06$                       | 55 4 | $6.58 \pm 2.86$                             | 76 4 |
| 60             | $10.77 \pm 3.87$                       | 65 4 | $0.00 \pm 0.00$                             | 84 4 |
| 50             | $3.08 \pm 2.16$                        | 65 4 | $1.35 \pm 1$                                | 74 4 |

**Table I: Myocyte lethality following a single 10 ms PEF application according to the cell orientation.** Only cells showing axis angle with respect to electric field of  $0 \pm 10^\circ$  (parallel) and  $90 \pm 10^\circ$  (perpendicular) were used for this experiment. Lethality was established by the loss of morphological integrity and expressed as a percentage of the total number of cells for a given orientation. n: number of cells, N: number of animals.

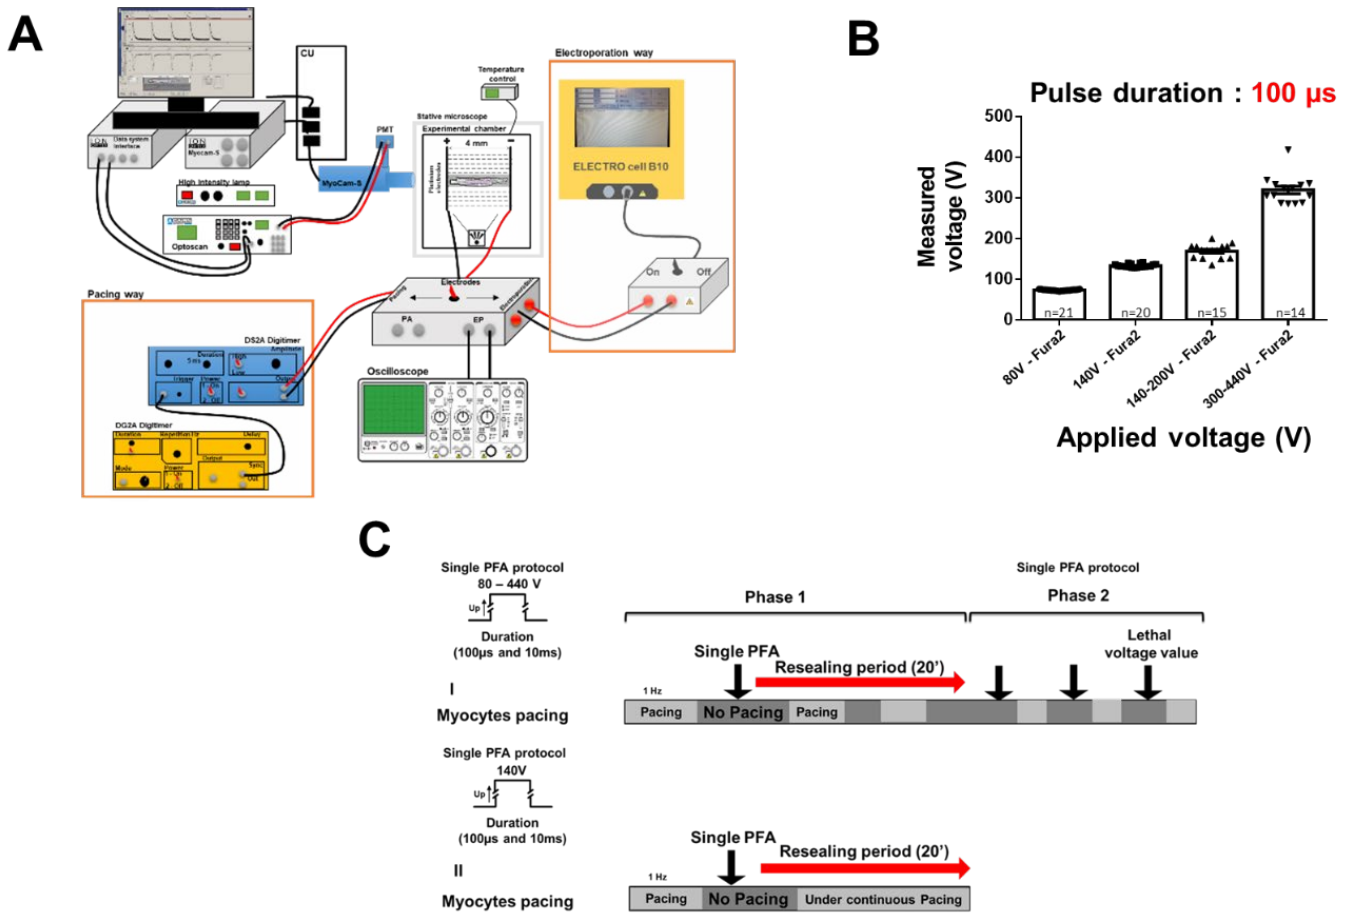

**Figure I: Schematic representation of the experimental set up and quality control results. (A) Experimental set up.** Cardiomyocytes were field-stimulated to contract at 1 Hz (DS2A stimulator, Digitimer Ltd, UK) and electroporated (Electro Cell B10, Leroy Biotech, France) in an experimental chamber using 2 platinum electrodes (4 mm spacing). All experiments were performed at 34 - 37°C. Sarcomere shortening and  $Ca^{2+}$  transients were recorded by video contrast analysis (IonOptix Corporation, USA) and spectrofluorimetry (Cairn Research, UK) in Fura-2 AM loaded (4  $\mu$ M) myocytes. **(B) Quality control of the voltage delivered by the EP generator.** The voltage delivered during electrical pulses was monitored using an oscilloscope to confirm the generator operated at the requested voltage (V). n: number of cells - data are mean  $\pm$  standard error of the mean. Dots in bar graphs represent individual values. **(C) Electroporation protocols.** Different protocols were used to determine the effect of single monophasic electroporating pulse of varying duration/amplitude on myocyte contractility,  $[Ca^{2+}]_i$  and evaluate cell recovery and lethality.

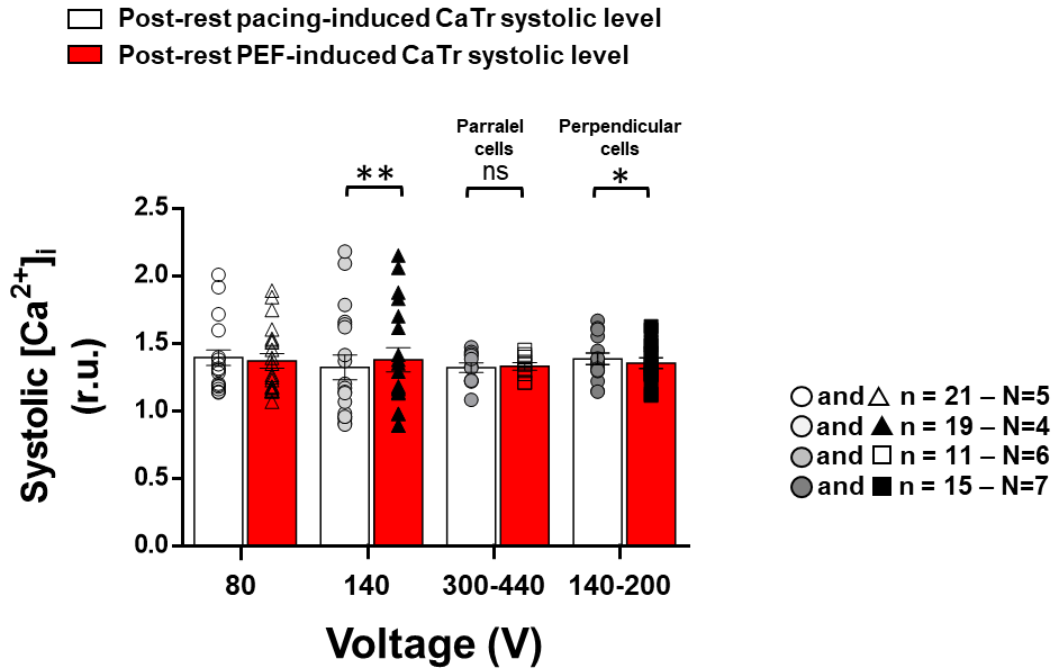

**Figure II: Comparison of pacing-induced versus PEF-induced post-rest systolic  $[Ca^{2+}]_i$ .** Prior to EP, quiescent left ventricular myocytes were electrically-stimulated to contract at 1 Hz. The amplitude of the first  $Ca^{2+}$  transient upon initiating 1 Hz pacing (open bars) was compared to that of the  $Ca^{2+}$  transient induced by an electroporating pulse in the same cell (red bars). Data are represented as mean  $\pm$  standard error of the mean with individual values for each cell. Paired t-test: \*: ns: not significant,  $p < 0.05$ , \*\*:  $p < 0.01$ . n: Number of cells; N: number of animals.

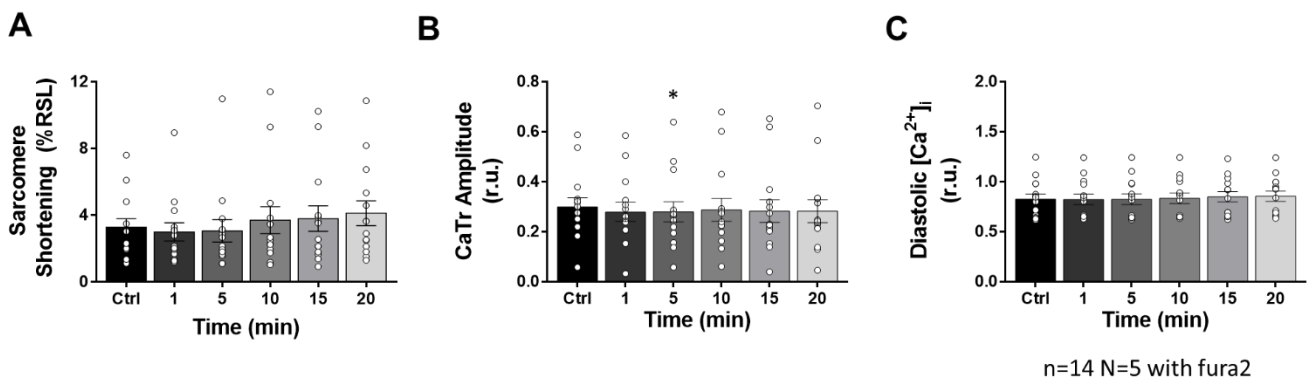

**Figure III: Time-related effects on rat left ventricular myocyte contractility and  $[Ca^{2+}]_i$ .** Myocytes were subjected to the same pacing protocol (1 Hz) at 34-37°C but without EPs. **A:** Sarcomere shortening expressed as percentage of the resting sarcomere length (%RSL). **B:**  $Ca^{2+}$  transient (CaTr) amplitude expressed as a 340:380 fluorescence ratio (r.u., ratio units). **C:** Diastolic  $Ca^{2+}$  level remained stable across time. Data are mean  $\pm$  standard error of the mean. Dots in bar graphs represent individual values RM on-way ANOVA \*:  $p < 0.05$ . n: number of cells, N: number of animals.

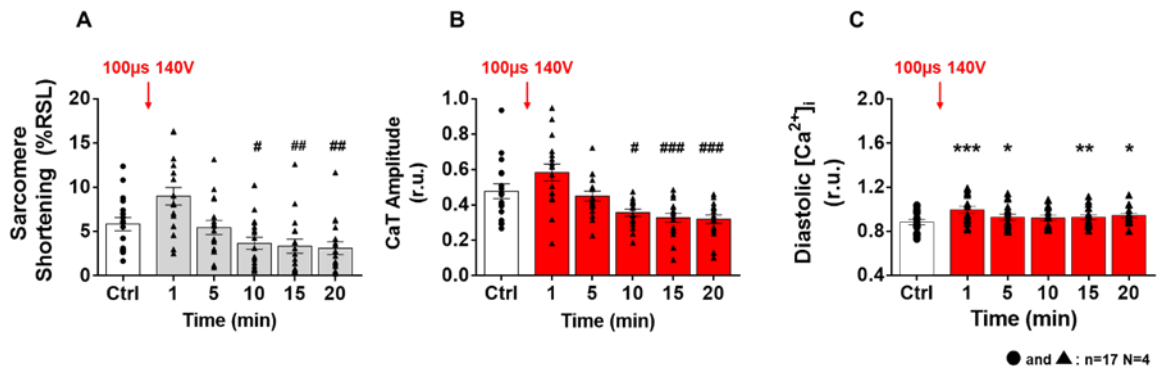

**Figure IV: Reversibility of sarcomere shortening and Ca<sup>2+</sup> handling following intermediate voltage electroporation under continuous electrical pacing.** Sarcomere lengths and [Ca<sup>2+</sup>]<sub>i</sub> were monitored in isolated LVM before (Ctrl), during and 1 to 20 min after (T0+1min to T0+20min) a 100 μs EP delivered at 140V, in myocytes continuously paced at 1 Hz to contract. Sarcomere shortening (A), expressed as a percentage of resting sarcomere length (%RSL) and Ca<sup>2+</sup> transient (CaTr) amplitude (r.u., 340:380 ratio units) (B) were significantly reduced at 10, 15, 20 min post- EP. Diastolic Ca<sup>2+</sup> level was significantly increased after EP. Data are represented as mean ± standard error of the mean with individual values for each cell. RM one-way ANOVA: \*: p<0.05, \*\*: p<0.01, \*\*\*: p<0.001, #: p<0.05, ##: p<0.01, ###: p<0.001. n: number of cells, N: number of animals.

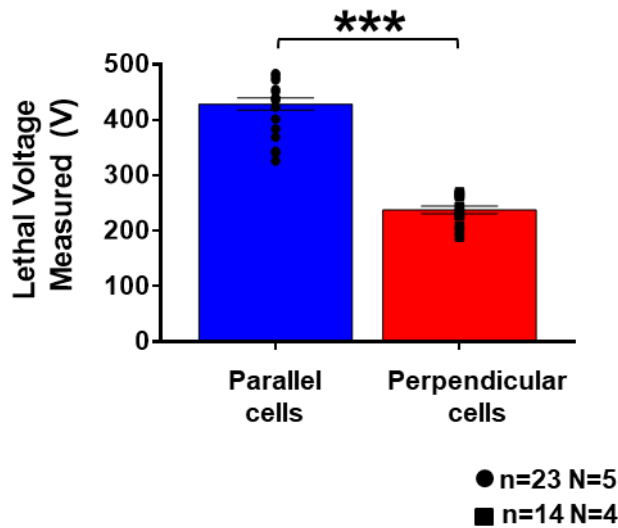

**Figure V: Lethal voltage threshold following a single electroporating pulse application in parallel and perpendicular-oriented myocytes without Fura 2.** Myocytes were subjected to a single 100 μs EP of varying voltages. Data are mean ± standard error of the mean. Dots in bar graphs represent individual values. Unpaired t-test: \*\*\* p<0.001. n: number of cells, N: number of animals.

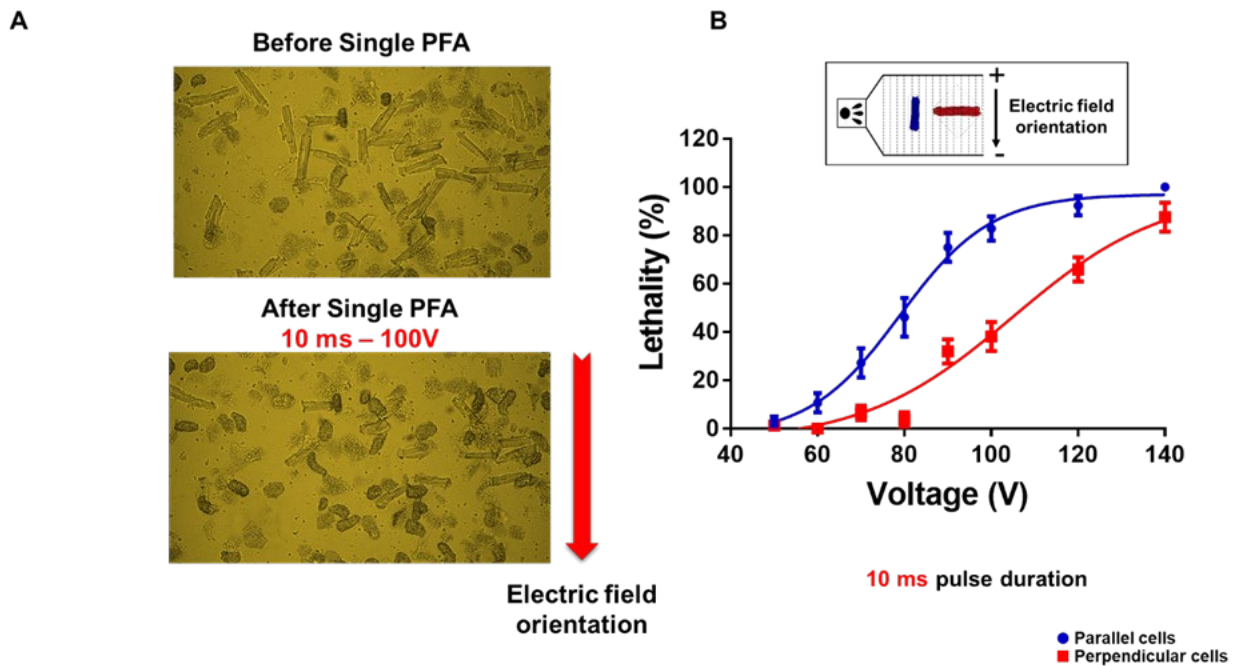

**Figure VI: Lethal effect of a single 10ms electroporating pulse on left ventricular myocytes according to the cell orientation.** (A) Images taken before and after a 10 ms, 100 V EP application were used to quantify lethality in LVM oriented parallel and perpendicular to the electric field. (B) Lethality curves representing the percentage of dead cells as a function of voltage and according to cell orientation. Cell death increased as the EP voltage was increased. Parallel cells (red) were more sensitive to PEF-induced cell death than perpendicular cells (blue) (voltage at 80% of lethality: 96 Vs 151 V for parallel and perpendicular cells respectively). Inset: cell orientation and electric field direction. Data are represented as mean  $\pm$  standard error of the mean.

### A Parallel to the electrical field

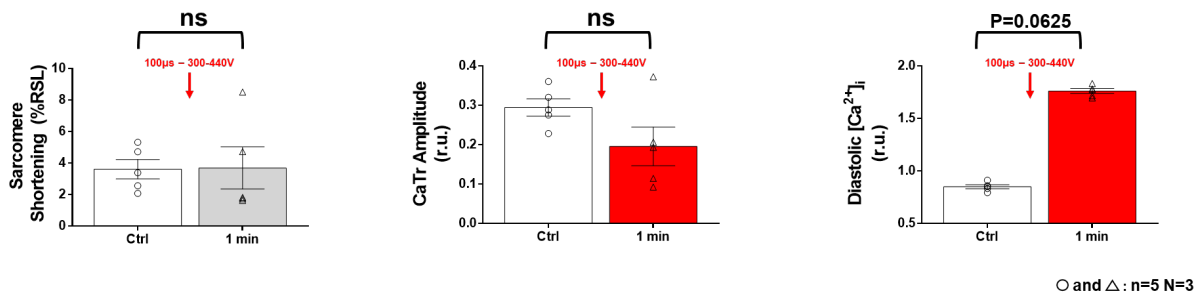

### B Perpendicular to the electrical field

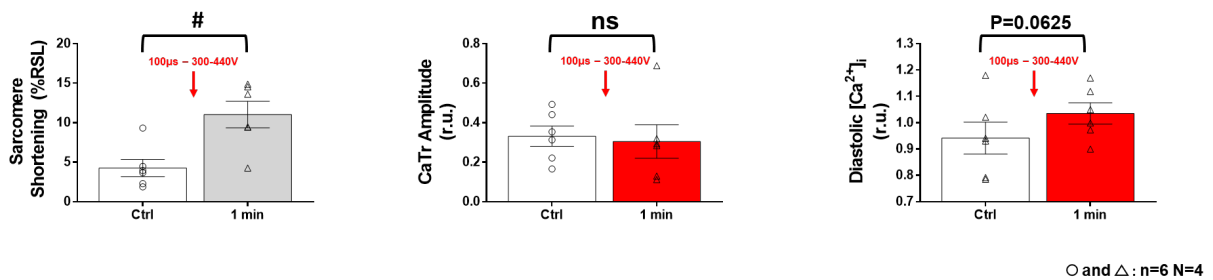

**Figure VII: Effect of high voltage pulses on sarcomere shortening and [Ca<sup>2+</sup>]<sub>i</sub> in left ventricular myocytes oriented parallel and perpendicular to the electric field at 1 min post-electroporation.** Left ventricular (LV) myocyte sarcomere lengths and [Ca<sup>2+</sup>]<sub>i</sub> were monitored before and 1 min after the application of a high voltage electroporating pulse (100 µs, 300-340 V for parallel, 140-200 V for perpendicular cells). Note that only 45% of parallel and 40% of perpendicular-oriented myocytes responded to 1 Hz pacing at 1 min post- EP. **A:** In parallel cells, sarcomere shortening (expressed as a percentage of resting sarcomere length (%RSL), Ca<sup>2+</sup> ransient (CaTr) amplitude and diastolic Ca<sup>2+</sup> level did not change significantly after EP despite a trend for an increase in diastolic Ca<sup>2+</sup> level. **B:** In perpendicular cells, sarcomere shortening was significantly increased 1 min after EP while CaTr amplitude and diastolic Ca<sup>2+</sup> level remained unchanged. Data are represented as mean ± standard error of the mean with individual values for each cell. Paired t-test: #: ns: not significant, p<0.05. Number of cells, N: number of animals.
